# Supplementary material for: Machine Learning-Based Identification of Root Knot Nematodes: A Novel Paradigm in Precision Agriculture
Source: Research Square preprint supplement (doi:10.21203/rs.3.rs-7458387/v1), 2025-10-07
Supplement: Supplementary file 1 [file b8d54ecaf075beabe1b73b97.docx]

**Supporting Information**

**Machine Learning-Based Identification of Root Knot Nematodes: A Novel Paradigm in Precision Agriculture**

Sristi Das1#, Koyel Ghosh2,5#, Sandip Mondal1,3#, Suvasri Dutta1, Matiyar Rahaman Khan4, Utpal Garain2, Abhishek Mukherjee1*

#These authors have contributed equally

1Agricultural and Ecological Research Unit, Indian Statistical Institute, Giridih, Jharkhand - 815 301, India.

2Computer Vision and Pattern Recognition Unit, Indian Statistical Institute, Kolkata, West Bengal, India.

3Department of Plant Pathology, North Dakota State University, Fargo, ND 58105, USA

4Division of Nematology, Indian Agricultural Research Institute, New Delhi 110012, India.

5School of Computing, College of Engineering and Technology, SRM Institute of Science & Technology, Kattankulathur, Tamil Nadu, India

Corresponding author Email: Abhishek Mukherjee; [amukh@isical.ac.in,](mailto:amukh@isical.ac.in,) [abhimukh.isi@gmail.com](mailto:abhimukh.isi@gmail.com)


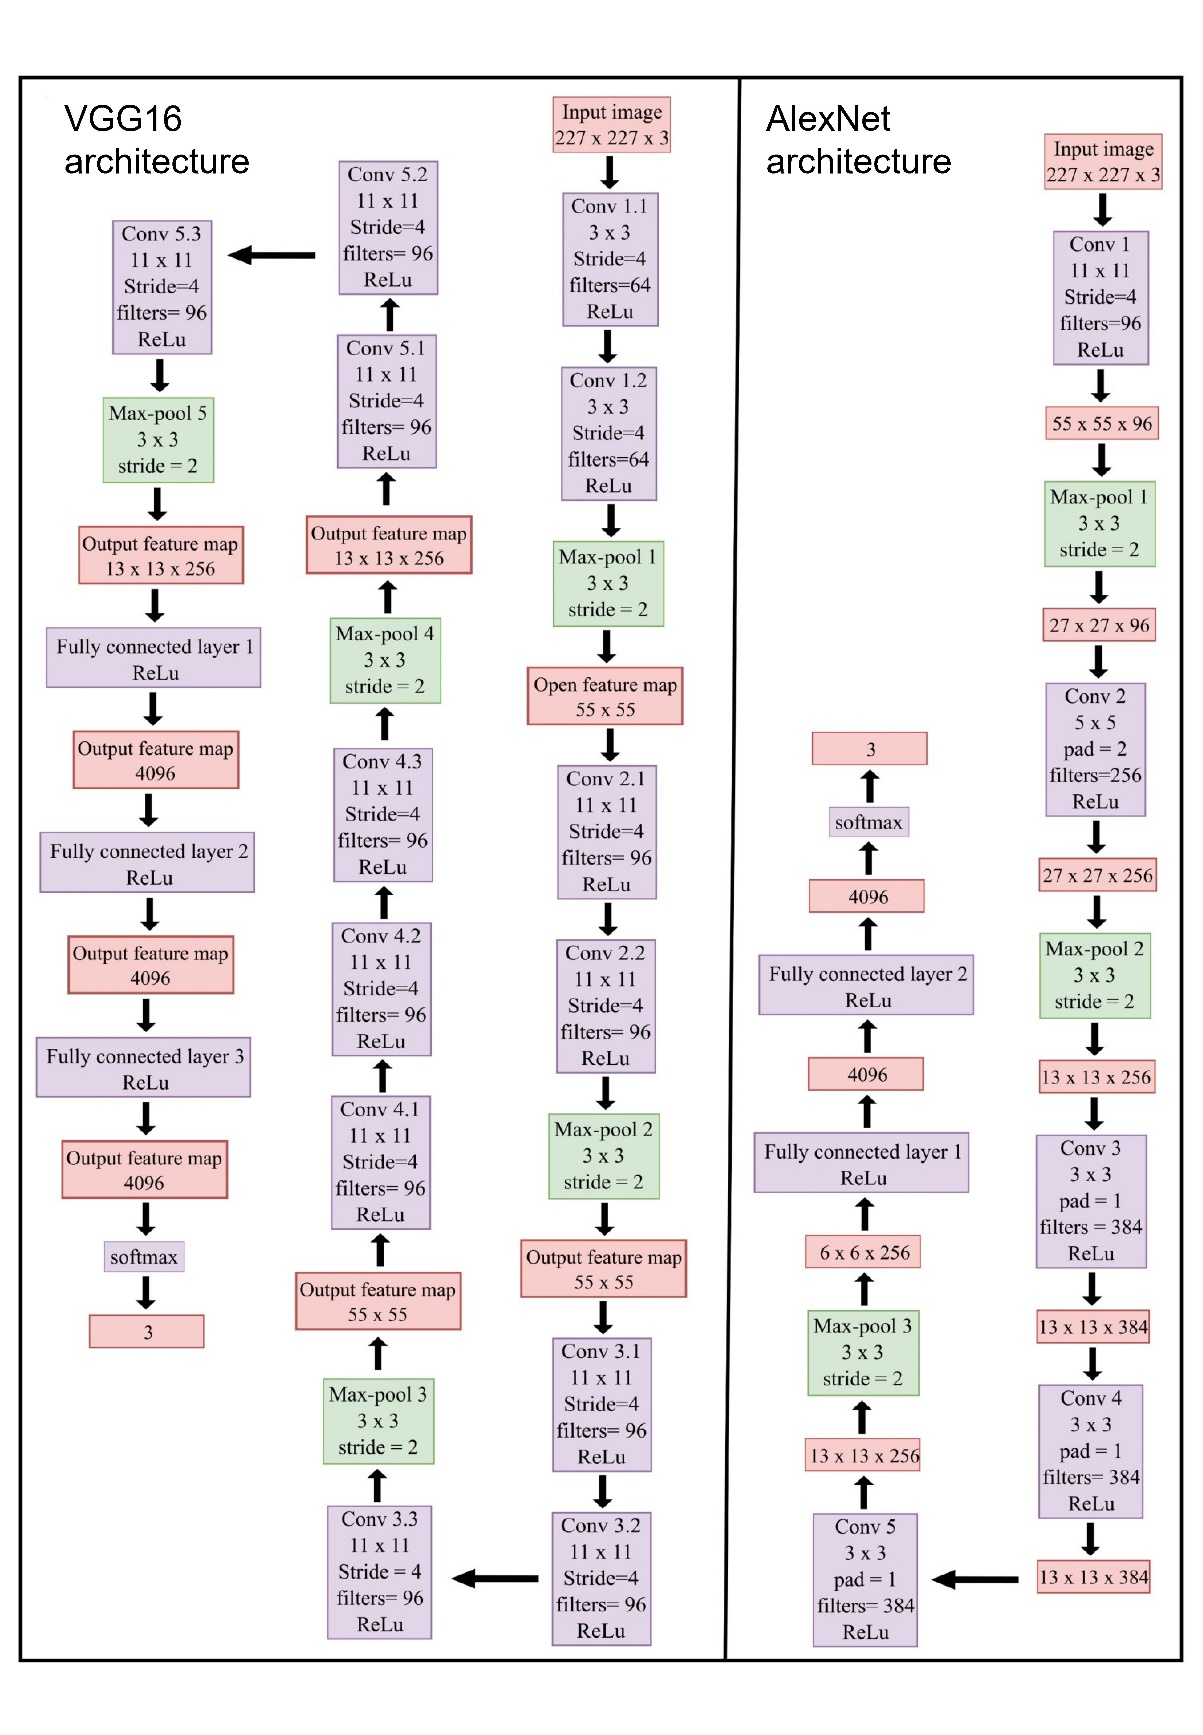


**Supplementary Figure S1.** (a) Alexnet and (b) VGG16 model architecture

**Table S1.** Distribution of perineal pattern images across three root-knot nematode species, stratified by species and split into 5-fold for cross-validation: *M. graminicola* (class 0), *M. incognita* (class 1), and *M. javanica* (class 2).

| **Folds** | **M. graminicola**  (class 0) | **M. incognita**  (class 1) | **M. javanica**  (class 2) | **Total** |
| --- | --- | --- | --- | --- |
| **F1** | 35 | 14 | 21 | 70 |
| **F2** | 35 | 14 | 20 | 69 |
| **F3** | 35 | 14 | 21 | 70 |
| **F4** | 35 | 14 | 21 | 70 |
| **F5** | 34 | 14 | 21 | 69 |
| **Total** | 174 | 70 | 104 | 348 |

**
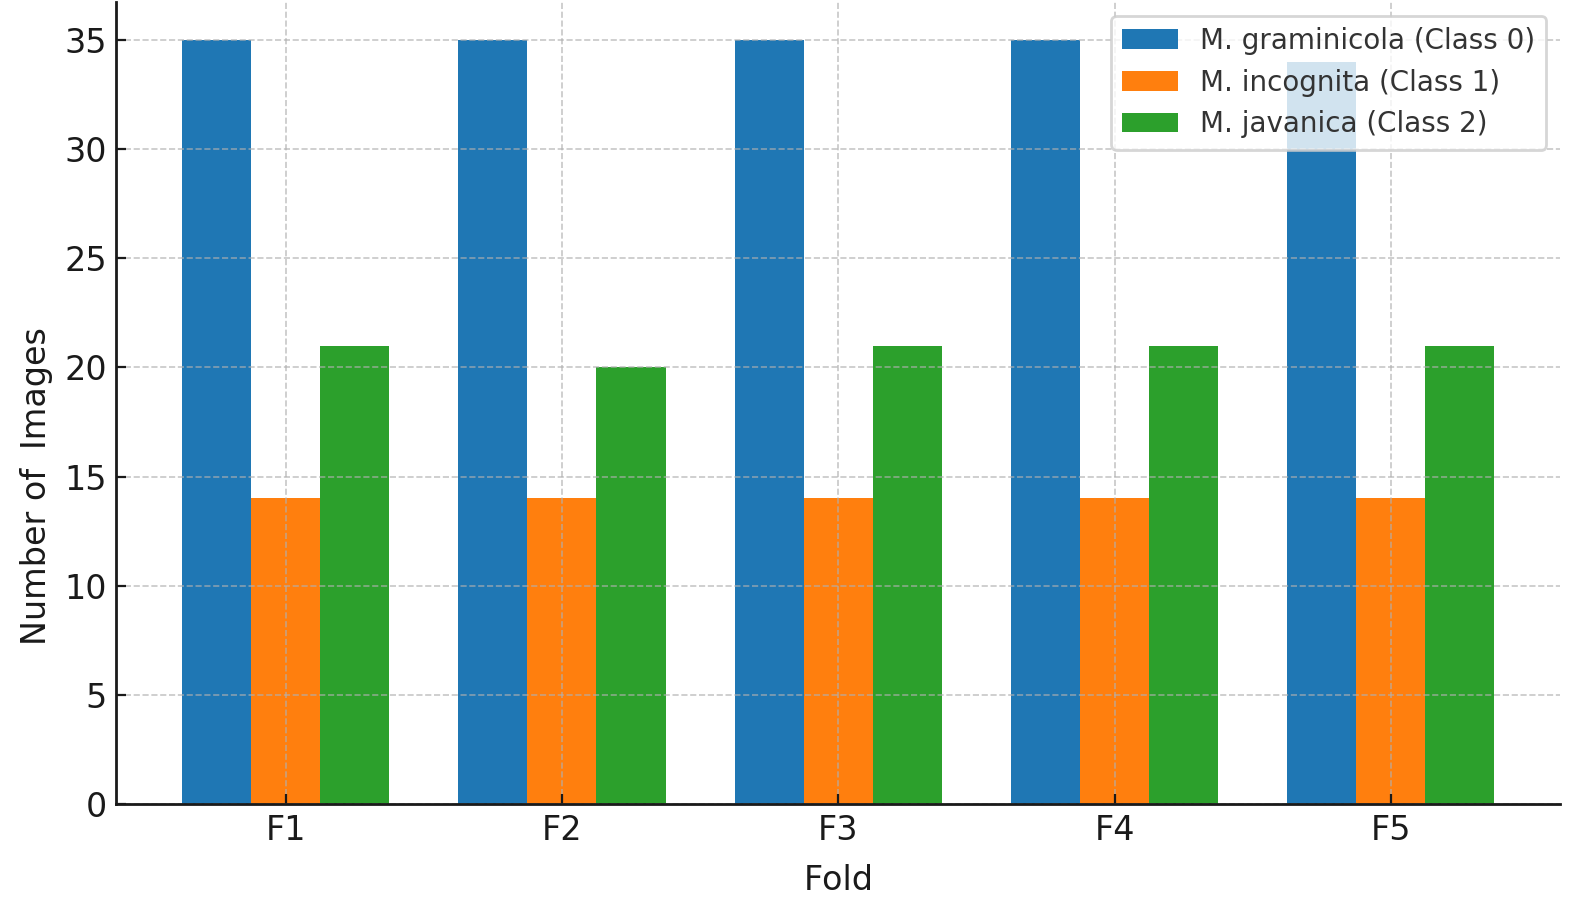
**

**Figure S2.** Bar chart showing the perineal pattern images stratified and evenly divided into five folds for cross-validation, while maintaining the class-wise distribution of *M. graminicola* (Class 0), *M. incognita* (Class 1), and *M. javanica* (Class 2).

# **Table S2**. Comparative overview of CNN-based nematode identification models.

| **Feature / Aspect** | **Our Study (2024)** | **NemaNet (Abade et al., 2021)** | **NemaRec (Qing et al., 2021)** |
| --- | --- | --- | --- |
| Target taxa | *M. incognita, M. javanica, M. graminicola* | Five PPNs from soybean (e.g., *M. incognita, H. glycines*) | 19 genera of soil nematodes |
| Taxonomic resolution | Species-level | Species-level | Genus-level |
| Image source | Perineal pattern images | Whole-body images (live nematodes in bright field) | Microscopy images (head, tail, full body) |
| Model architecture | AlexNet and VGG16 | Custom CNN (NemaNet) | ResNet101 |
| Image annotation | Morphological and SCAR marker confirmed | Expert-labelled images | Morphological + ecological labelling |
| Training dataset size | 348 images (manually curated) | 7,500 images (1,500/species) | ~2,769 images (augmented) |
| Validation approach | 5-fold cross-validation | Train-test split (80/20) | Specimen and augmented datasets |
| Accuracy | ~95% | 96.6%–98.7% | 54–76% (specimen), up to 94% (augmented) |
| Comparison with human performance | Yes (3 annotators, Kappa, statistical tests) | No | No |
| Model interpretability | Yes (Integrated Gradients) | No | No |
| Web deployment | Not yet | No | Yes |
| Ecological index calculation | No | No | Yes (MI, PPI, feeding types) |
| Focus | Species-level diagnostics for RKNs | Field diagnosis of soybean PPNs | Environmental monitoring and soil health |
